# Supplementary material
Source: publisher figshare collection journal article supplement (https://gsapubs.figshare.com/ndownloader/files/22758392)
Supplement: Supplementary file 1 [file 22758392]

Appendix Table DR1: Measured composition of individual hydrothermal fluid samples at 5°S, MAR

A. Koschinsky, Page 1

|                                |              | T   | pH   | H2S  | Mg   | Cl  | Br  | Na  | K    | Ca   | Si   | Li   | Sr   | Fe   | Mn   | Cu   | Co   | Zn   | Pb  | Mo  | B   |
|--------------------------------|--------------|-----|------|------|------|-----|-----|-----|------|------|------|------|------|------|------|------|------|------|-----|-----|-----|
| Year                           | Sample ID    | °C  | 25°C | μM   | mM   | mM  | μM  | mM  | mM   | mM   | mM   | μM   | nM  | nM  | μM  |
| TURTLE PITS - Two Boats        |              |     |      |      |      |     |     |     |      |      |      |      |      |      |      |      |      |      |     |     |     |
| 2005                           | 141 ROV-12   | -   | 5.19 | -    | 34.3 | 459 | 653 | 388 | 9.6  | 10.6 | 3.3  | 172  | 67.8 | 788  | 170  | 52.1 | 0.70 | 25.8 | 101 | 82  | 468 |
|                                | 141 ROV-13   | -   | 5.1  | -    | 31.3 | 446 | 645 | 376 | 9.4  | 10.3 | 4.9  | 192  | 62.5 | 1146 | 192  | -    | -    | -    | -   | -   | 478 |
|                                | 141 ROV-14   | -   | 4.9  | -    | 30.7 | 445 | 632 | 375 | 9.6  | 10.1 | 4.3  | 203  | 62.0 | 1218 | 205  | -    | -    | -    | -   | -   | 488 |
|                                | 141 ROV-15   | -   | 3.8  | -    | 24.1 | 396 | 612 | 334 | 8.9  | 9.0  | 6.7  | 234  | 53.6 | 1961 | 245  | -    | -    | -    | -   | -   | 476 |
| 2006                           | 3 ROV-10     | 395 | 3.2  | -    | 8.3  | 317 | -   | 273 | 8.8  | 9.3  | 9.8  | 356  | 34.9 | 3345 | 411  | 64.8 | 0.75 | 25.4 | 93  | 66  | -   |
|                                | 12 ROV-8     | 407 | 3.1  | 3990 | 2.8  | 283 | 495 | 249 | 8.8  | 8.8  | 11.0 | 410  | 28.4 | 3733 | 443  | 8.8  | 0.48 | 27.0 | 53  | 20  | 541 |
|                                | 12 ROV-B7    | -   | 6.2  | -    | 49.5 | -   | -   | 460 | 10.3 | 10.5 | 0.8  | 52   | 81.4 | 253  | 31   | 1.0  | 0.04 | 2.6  | 8   | 124 | 430 |
|                                | 12 ROV-B8    | -   | 5.6  | -    | 44.2 | 503 | 792 | 435 | 10.1 | 10.3 | 1.8  | 90   | 77.1 | 588  | 71   | 2.7  | 0.12 | 8.8  | 23  | 105 | 436 |
|                                | 12 ROV-5     | 405 | 3.4  | -    | 13.2 | 339 | 573 | 296 | 9.1  | 9.2  | 8.7  | 333  | 40.4 | 2952 | 351  | 14.9 | 0.64 | 52.7 | 139 | 53  | 518 |
|                                |              |     |      |      |      |     |     |     |      |      |      |      |      |      |      |      |      |      |     |     |     |
| COMFORTLESS COVE- Sisters Peak |              |     |      |      |      |     |     |     |      |      |      |      |      |      |      |      |      |      |     |     |     |
| 2006                           | 20 ROV-5     | 350 | 4.9  | -    | 38.1 | 459 | 720 | 401 | 9.5  | 12.5 | 4.3  | 114  | 76.7 | 1000 | 193  | 90.6 | 0.43 | 40.7 | 110 | 160 | 469 |
|                                | 20 ROV-6     | 380 | 3.1  | 7200 | 7.4  | 269 | 450 | 245 | 7.8  | 11.5 | 12.6 | 300  | 42.0 | 2913 | 609  | 94.2 | 0.38 | 42.4 | 108 | 84  | 569 |
| RED LION - Sugarhead           |              |     |      |      |      |     |     |     |      |      |      |      |      |      |      |      |      |      |     |     |     |
| 2005                           | 146 ROV-2    | -   | 7.9  | -    | 54.2 | 559 | 839 | 479 | 10.4 | 10.6 | 0.06 | 28   | 90.2 | 0.57 | 0.69 | -    | -    | -    | -   | -   | 436 |
|                                | 146 ROV-7    | -   | 4.9  | -    | 19.1 | 553 | 897 | 481 | 16.4 | 15.8 | 12.1 | 785  | 72.2 | -    | 467  | -    | -    | -    | -   | -   | 493 |
|                                | 146 ROV-8    | -   | 4.5  | -    | 11.1 | 547 | 897 | 478 | 17.7 | 16.9 | 17.8 | 963  | 69.1 | -    | 573  | -    | -    | -    | -   | -   | 496 |
|                                | 146 ROV-9    | -   | 4.2  | -    | 5.3  | 550 | 840 | 485 | 19.0 | 17.9 | 20.6 | 1115 | 65.5 | 724  | 668  | -    | -    | -    | -   | -   | 514 |
|                                | 146 ROV-11   | -   | 6.1  | -    | 43.1 | 553 | 896 | 482 | 12.3 | 11.8 | 4.1  | 252  | 83.9 | -    | 133  | -    | -    | -    | -   | -   | 454 |
|                                | 146 ROV-12   | -   | 6.2  | -    | 44.9 | 553 | 851 | 476 | 12.0 | 11.8 | 3.6  | 222  | 84.3 | -    | 119  | -    | -    | -    | -   | -   | 448 |
|                                | 146 ROV-9/10 |     |      |      | 20.5 |     |     |     |      |      |      |      |      |      |      | 3.5  | 0.02 | 40.1 | 264 | 53  |     |
| RED LION - Tannenbaum          |              |     |      |      |      |     |     |     |      |      |      |      |      |      |      |      |      |      |     |     |     |
| 2006                           | 7 ROV-4      | 345 | 5.5  | -    | 38.4 | 551 | 845 | 467 | 12.7 | 11.8 | 4.6  | 310  | 77.9 | 164  | 161  | -    | -    | -    | -   | -   | 439 |
| RED LION - Mephisto            |              |     |      |      |      |     |     |     |      |      |      |      |      |      |      |      |      |      |     |     |     |
| 2006                           | 7 ROV-13     | 346 | 5.9  | -    | 45.4 | 558 | 856 | 461 | 11.3 | 11.0 | 2.2  | 162  | 80.9 | 114  | 113  | -    | -    | -    | -   | -   | 421 |

TABLE DR2. DIFFERENT ENDMEMBER FRACTIONS  
OF Fe, Cu, AND Zn IN THREE INDIVIDUAL SAMPLES  
FROM THE VENT TWO BOATS AT SITE TP

| Element              | Fraction                          | 12 ROV-8 | 12 ROV-5 | 3 ROV-10 |
|----------------------|-----------------------------------|----------|----------|----------|
| Fe ( $\mu\text{M}$ ) | Sampling T ( $^{\circ}\text{C}$ ) | 407      | 405      | 395      |
|                      | total                             | 4055     | 4290     | 4053     |
|                      | filtered                          | 4007     | 3833     | 3965     |
|                      | free and labile                   | 4000     | 3900     | 3880     |
| Cu ( $\mu\text{M}$ ) | total                             | 9        | 18       | 76       |
|                      | filtered                          | <3       | <3       | <3       |
|                      | free and labile                   | 0.0003   | 0.01     | 1.9      |
| Zn ( $\mu\text{M}$ ) | total                             | 28       | 64       | 29       |
|                      | filtered                          | <3       | <3       | <3       |
|                      | free and labile                   | 0.48     | 0.93     | 1.1      |

*Note:* The total fraction comprises the unfiltered sample, the filtered fraction is the <0.2  $\mu\text{m}$  fraction (both analysed by ICP-MS), and the free and labile fraction has been analysed onboard in filtered samples by voltammetry after 1 hour UV digestion.

**Methods:**

In-situ temperature measurements of the hydrothermal fluids were performed using an on-line temperature probe based on a hi-temperature NTC resistor, which was integrated into the KIPS fluid sampling system. The NTC is embedded in a soda glass bead and was aged at high temperatures. This assembly is mounted in the tip of a stainless steel tube with a resulting temperature constant of 5.2 s. The characteristic function of the individual sensor was determined by a calibration at 23 temperatures between 0°C and 450°C with an uncertainty of  $\pm 0.05^\circ\text{C}$  at each point, which was carried out by a licensed calibration laboratory. The sensor was operated at an external port of a Sea&Sun Technologies CTD, Germany, with real-time data transmission through the ROV serial port.

For the chemical analyses, different aliquots were collected: a non-filtered, non-acidified aliquot for onboard determination of pH, Eh, and sulfide concentration, a filtered, non-acidified aliquot for the determination of dissolved Fe (free and labile fraction), one filtered and acidified aliquot for the determination of dissolved major, minor, and trace metals, and one non-filtered, acidified aliquot for the total concentration of major, minor, and trace metals. Undissolved particles (mainly sulfides) were separately dissolved with pressure digestion, using 3ml HCl, 1ml HNO<sub>3</sub> and 1ml HF.

Dissolved Cu and Zn (free and labile fraction) were also analysed onboard directly after sampling by voltammetry using a Metrohm system with a 757 VA Computrace. Filtered fluid aliquots were submitted to a digestion for 1 hour in a UV Digestor (Model 705, Metrohm), buffered at pH 4.6 with 1 M acetate buffer solution and measured by anodic stripping voltammetry.

Sulfide concentrations were measured on-board via spectrophotometry at 660 nm wave length (Biochrom Libra S 12 spectrophotometer) applying the methylene blue method of Cline (1969). For this, dissolved sulfide was stabilized in a colloidal form as zinc sulfide using zinc acetate gelatine solution (100  $\mu\text{l}$  for 1 ml of hydrothermal fluid).

Dissolved Fe concentrations in filtered samples of hydrothermal fluids were measured on-board via spectrophotometry at 511 nm wave length, based on the determination of an orange-red ferroin complex, which is formed by Fe(II) ions in the fluid sample with 1,10-phenantroline in a pH range of 3-5

Ref.: Cline, J.D. (1969) Spectrophotometric Determination of Hydrogen Sulfide in Natural Waters. *Limnology and Oceanography*, 14: 454-458.

**Calculation of the depth of the reaction zone and the depth of phase separation:**

Quartz solubility constraints can be used to infer P-T conditions of the reaction zone below TP, based on experimental data from Foustoukos and Seyfried (2007). Assuming equilibrium between the low-chlorinity fluid and the host rock, a shallow reaction zone at  $\sim 430^\circ\text{C}/350$  bars is indicated. Calculating the depth of initial phase separation, based on the measured maximum temperature and the chlorinity of the emanating fluid (Bischoff and Pitzer, 1989; Tanger and Pitzer, 1989) yielded comparable results of  $425^\circ\text{C}/350$  bars for TP and about  $430^\circ\text{C}/360$  bars for SP (Fig. 3). However, both approaches are confined to closed system conditions. Hence, uncertainties may result from possible re-equilibrium between vapor phase and rock at lower pressures, from continuing phase separation during ascent, and from heat loss.
